# Supplementary material
Source: publisher figshare collection journal article supplement (https://diabetesjournals.figshare.com/articles/dataset/_/19525624)
Supplement: Supplementary file 1 [file 1]

## SUPPLEMENTARY FIGURES

Supplementary Figure S1. Incidence curves of participants in four trial groups: high risk subjects were randomized to parenteral insulin (n=159) and observation (n=157), and low risk subjects were randomized to oral insulin (n=177) and oral placebo (n=177).

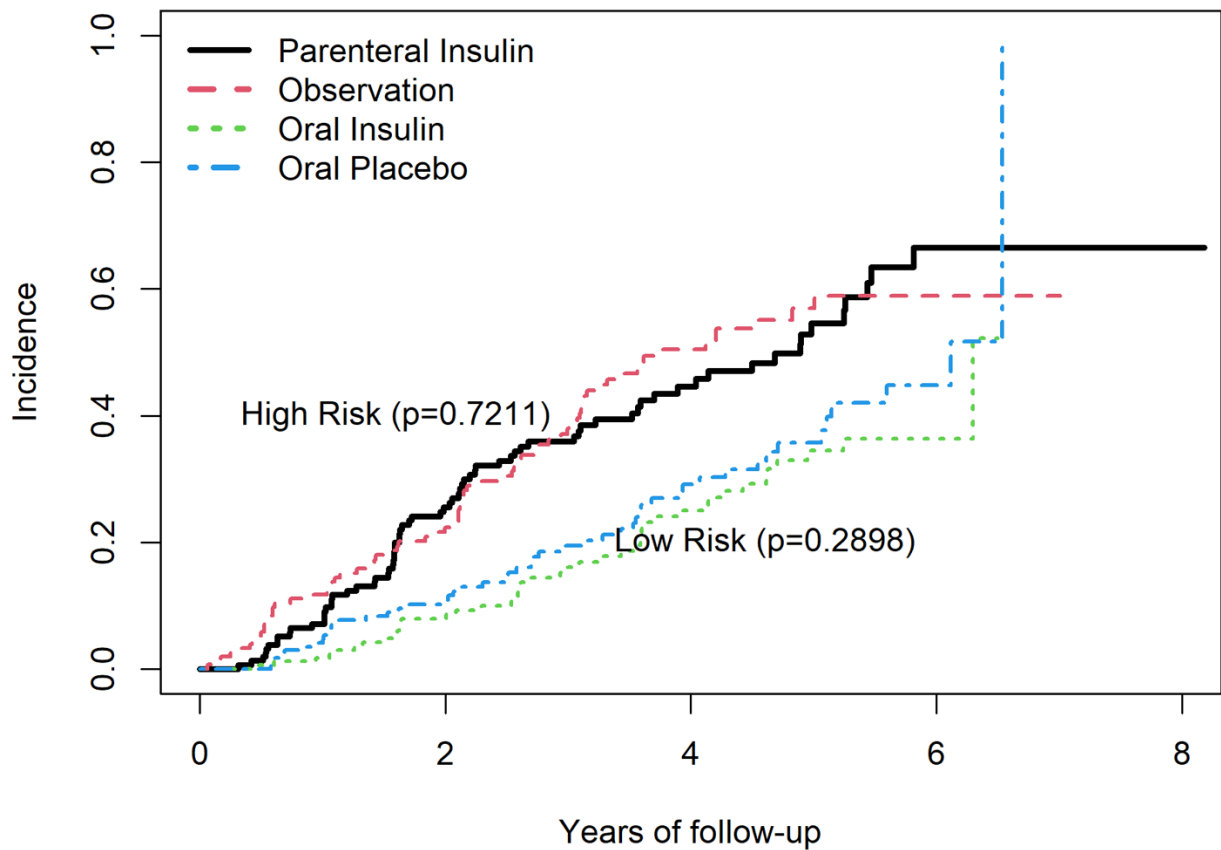

Supplementary Figure S2. Distributions of participants' ages among those with low and high risk for type 1 diabetes.

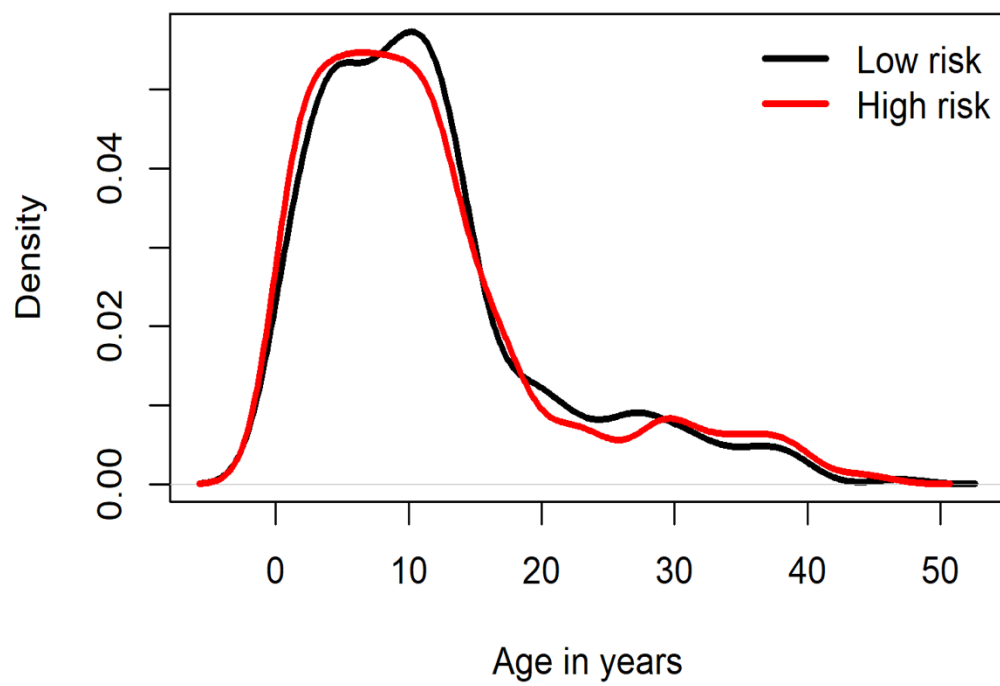

Supplementary Figure S3. Density distribution of original biomarker levels (ICA, IAA and HbA1c in the top three panels), and their transformed values by bi-directional power transformation (three lines in panel D).

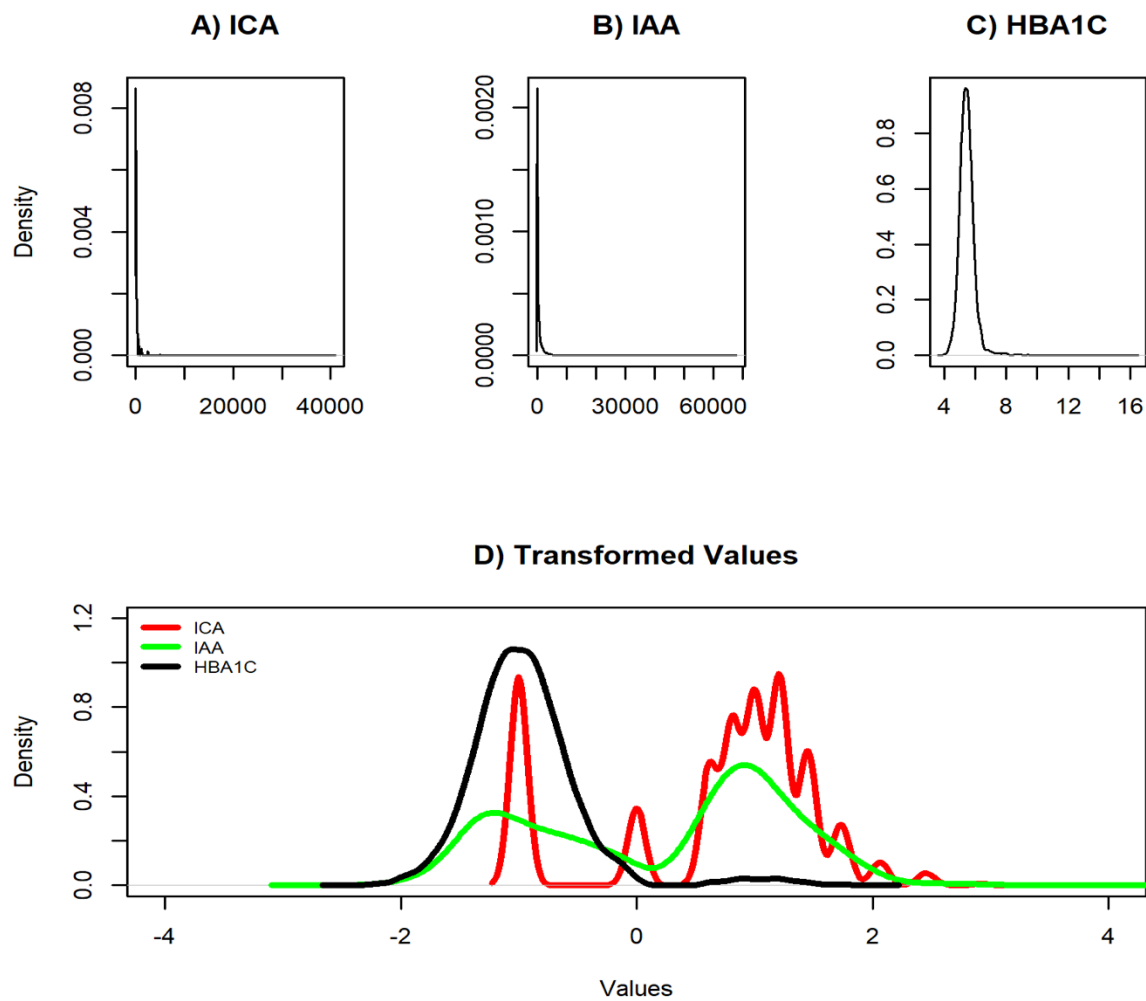

Supplementary Figure S4. The HLA Class II beta chain residue  $\beta 57$  is the determinant of many important structural and biological properties of the HLA-DQ heterodimer. We provide an example of each of the two haplotypes HLA-DQ7 (A1\*03:01-B1\*03:01), and HLA-DQ8 (A1\*03:01-B1\*03:02). For simplicity, only the  $\alpha 1\beta 1$  (antigen-binding) domain of HLA-DQ8 is shown, where select surface residues shown potentially interact with associated TCRs along with the bound insulin peptide (different in each case).

Supplementary Figure S4A

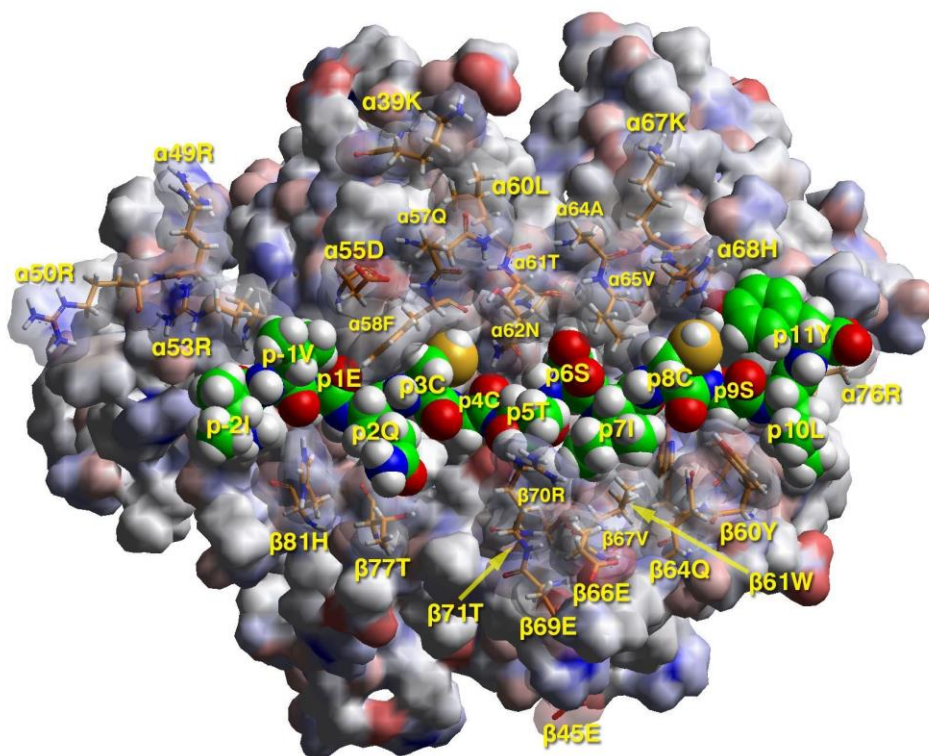

**A.** TCR view of the modelled structure of the HLA-DQ7—InsA2-14 with the  $\alpha 1\beta 1$  domain depicted as surfaces according to atomic charge (positive, blue; negative, red; neutral, grey; partial positive or negative charges with shades in-between), select HLA-DQ7 residues that are potential TCR contacts in stick form (nitrogen, blue; oxygen, red; carbon, orange; sulfur, yellow; hydrogen white) with transparent surface, and the bound antigenic peptide in space-filling form (same atom convention except carbon that is green). Residue  $\beta 57$ Asp is opposite to  $\alpha 76$ Arg covered by pocket 10 Leu (p10Leu). Also shown is  $\beta 45$ Glu/Gly in HLA-DQ7/DQ8 that affects considerably the surface electrostatic potential of the complex, and thus TCR selection (62).

Supplementary Figure S4B

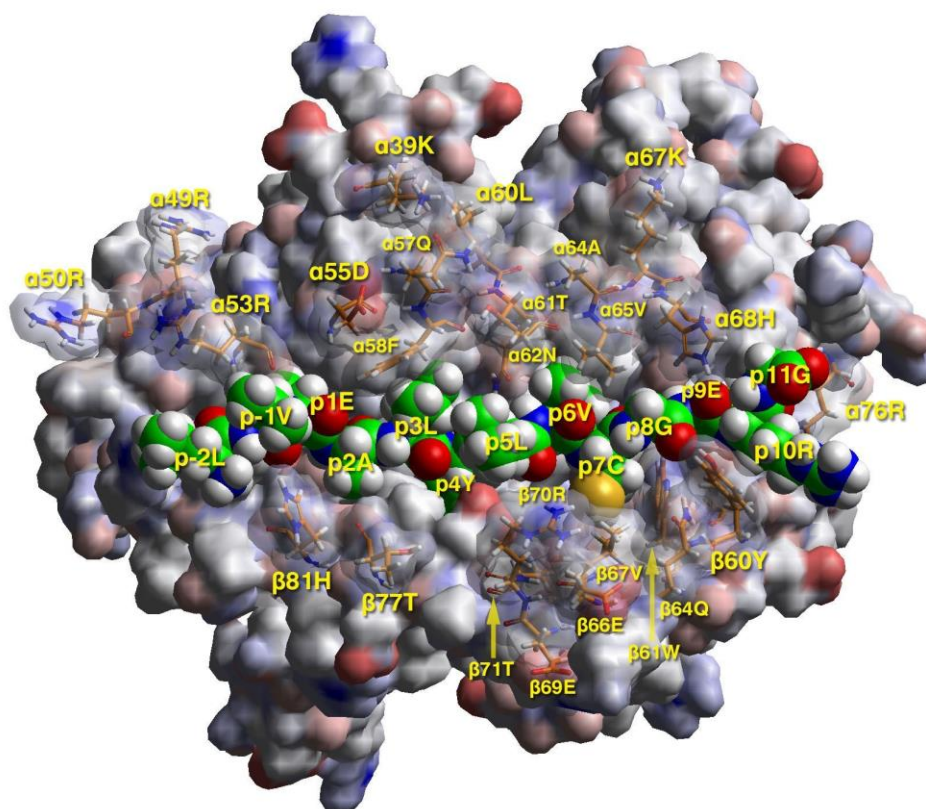

**B.** TCR view of the structure of the HLA-DQ8—InsB11-23/24Gly complex (1jk8.pdb) as reported (42). Residue  $\beta 57$ Ala is under p10Arg, while  $\alpha 76$ Arg forms a salt bridge with the side-chain carboxylate of p9Glu (partly covered). Evidence has been presented that during TCR interaction the InsB11-23 peptide is bound in the B14-B22 core nonamer register, yet the crystal structure shows the InsB13-B21 as the core bound nonamer (42, 63). Same depiction and color conventions as in A. Note the different anchors at p4, p6, p7 and p9 in HLA-DQ7, compared to HLA-DQ8, while the p1 anchor is the same, because of essentially identical pockets.

Supplementary Figure S5. Amino acid signal peptide sequences of HLA-DQB molecules, human preprorenin, preproinsulin, and CTLA-4, and bovine preprolactin.

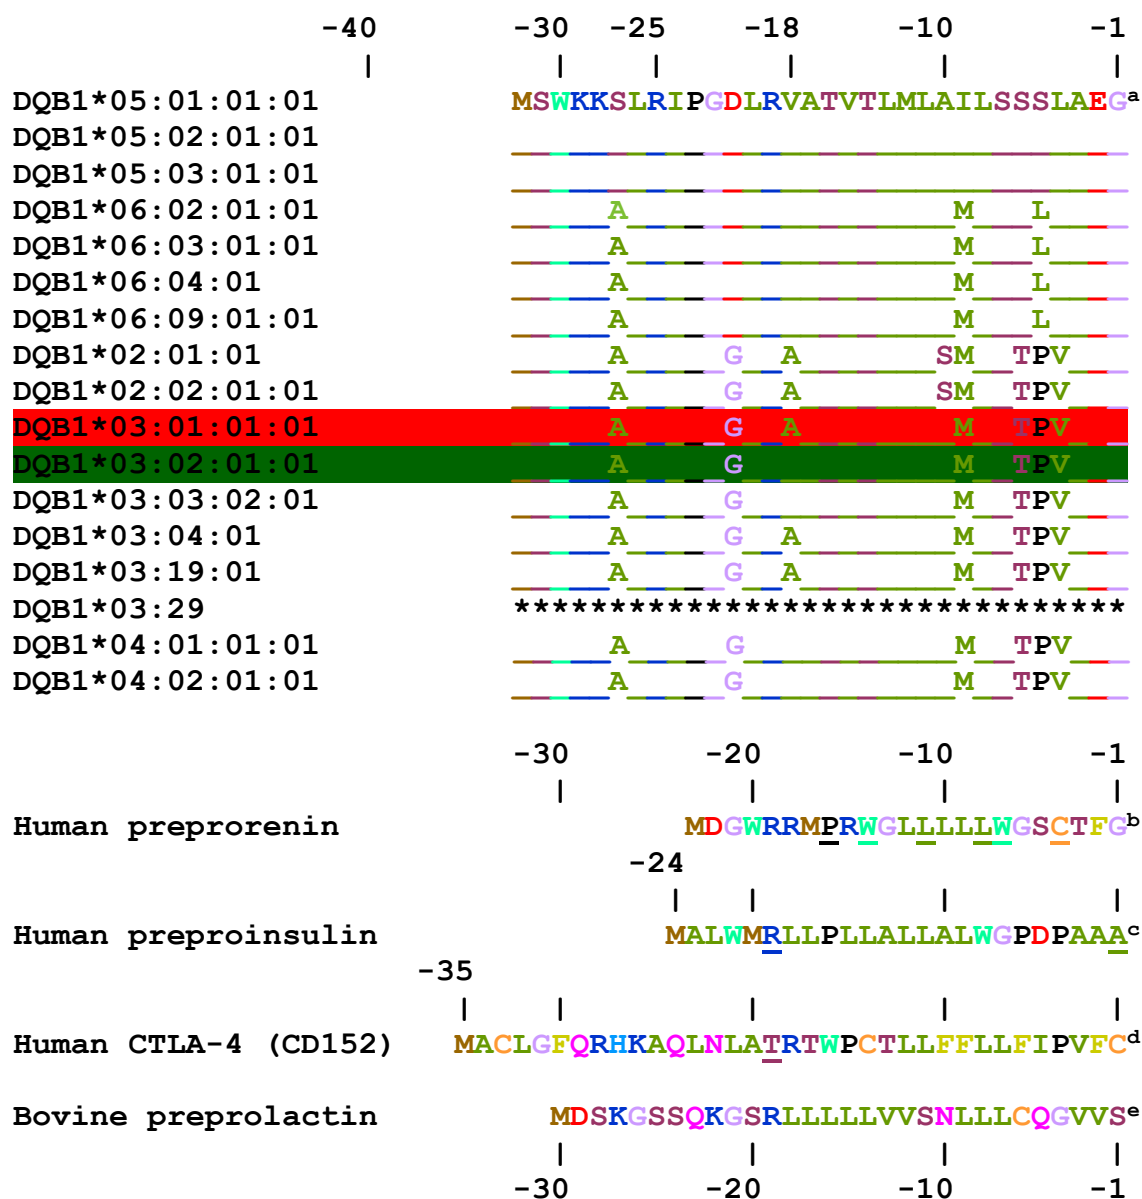

Notes:

- Coloring system from Papadopoulos GK et al. "A simplified system for coloring residues in amino acid sequences according to their physicochemical properties", *in preparation*. The DQB1\*03:01 allelic sequence is shaded red ("preventive" for T1D development), while the DQB1\*03:02 allelic sequence is shaded green ("permissive" for T1D development).
- Naturally occurring mutations underlined. Information on the mutations obtained from (57).
- Naturally occurring mutations underlined. Information on the mutations obtained from (58).
- Naturally occurring mutation underlined. Information on the mutations obtained from (59).
- Three-dimensional structure of biosynthetic intermediate analyzed in (47).

## COLOR CODE FOR AMINOACID RESIDUES:

Based on **nitrogen being blue**, **oxygen being red**, and **hydrophobic residues resembling olive oil**.

**D, E, acidic**,  $\text{COO}^-$

**R, K, basic**,  $[-\text{HN}=\text{C}-(\text{NH}_2)_2]^+$ ,  $\text{NH}_3^+$

**H, histidine, aromatic, acidic-basic properties of imidazole ring**

|

**Q, N, polar, amide side group**  $\text{O}=\text{C}-\text{NH}_2$

**W, H-bond donor N-containing indole ring, aromatic**

**Y, H-bond donor OH-containing, aromatic**

**S, T, OH-containing, H-bond donor, amphiphilic**

**F, aromatic, hydrophobic**

**A, V, I, L, aliphatic, hydrophobic**

**C, sulfur-containing, slightly hydrophilic, potential S-S bond former**

**M, sulfur-containing, hydrophobic**

**G, glycine, most flexible**

**P, proline, breaks continuity of  $\alpha$ -helix,  $\beta$ -sheet**
