# Supplementary material
Source: publisher figshare collection journal article supplement (https://diabetesjournals.figshare.com/articles/dataset/_/19525624)
Supplement: Supplementary file 2 [file 1]

Table S1. Descriptive statistics of race, sex, treatment, stratum, risk level, use of insulin and age among 670 participants in DPT-1. P-values measures associations of individual category, in comparison with the reference with the progression to T1D onset, while p-value for age measures its association with the progression to T1D onset.

| Covariates     | Category           | N   | coef  | HR        | SE   | Z     | p        |
|----------------|--------------------|-----|-------|-----------|------|-------|----------|
| Race           | White              | 608 | 0.00  | Reference |      |       |          |
|                | Asian              | 3   | 0.88  | 2.40      | 0.71 | 1.23  | 2.18E-01 |
|                | Black              | 9   | -0.18 | 0.83      | 0.58 | -0.31 | 7.54E-01 |
|                | Hispanic           | 29  | -0.36 | 0.70      | 0.41 | -0.86 | 3.91E-01 |
|                | Other              | 7   | 0.66  | 1.93      | 0.51 | 1.30  | 1.92E-01 |
|                | Unkown             | 14  | -0.53 | 0.59      | 0.58 | -0.91 | 3.62E-01 |
| Sex            | Male               | 378 | 0.00  | Reference |      |       |          |
|                | Female             | 292 | 0.11  | 1.11      | 0.13 | 0.82  | 4.13E-01 |
| Age (10 years) |                    |     | -0.23 | 0.79      | 0.08 | -2.94 | 3.28E-03 |
| Treatment      | Oral Placebo       | 177 | 0.00  | Reference |      |       |          |
|                | Oral Insulin       | 159 | -0.23 | 0.80      | 0.21 | -1.09 | 2.77E-01 |
|                | Observation        | 157 | 0.65  | 1.91      | 0.18 | 3.51  | 4.42E-04 |
|                | Parenteral Insulin | 177 | 0.57  | 1.77      | 0.18 | 3.11  | 1.86E-03 |
| Risk Level     | Low                | 354 | 0.00  | Reference |      |       |          |
|                | High               | 316 | 0.72  | 2.05      | 0.13 | 5.43  | 5.75E-08 |

Table S2. Distribution of race/ethnicity, sex, treatment and use of insulin among 354 low risk (oral insulin group) and 316 high risk participants (insulin injection group). P-values measure if row frequencies are the same between low and high-risk groups.

| Variable       | Categories   | Low Risk (n=354) | High Risk (n=316) | p        |
|----------------|--------------|------------------|-------------------|----------|
| Race/ethnicity | White        | 314 (88.7)       | 294 (93.04)       | 6.14E-02 |
|                | Asian        | 2 (0.56)         | 1 (0.32)          | 1.00E+00 |
|                | Black        | 7 (1.98)         | 2 (0.63)          | 1.83E-01 |
|                | Hispanic     | 20 (5.65)        | 9 (2.85)          | 8.78E-02 |
|                | Other        | 5 (1.41)         | 2 (0.63)          | 4.56E-01 |
|                | Unknown      | 6 (1.69)         | 8 (2.53)          | 5.90E-01 |
| Sex            | Female       | 139 (39.27)      | 153 (48.42)       | 1.92E-02 |
| Treatment      | Oral Placebo | 177 (50)         |                   |          |
|                | Oral Insulin | 177 (50)         |                   |          |
|                | Observation  |                  | 157 (49.68)       |          |
|                | Intervention |                  | 159 (50.32)       |          |
| Use of insulin | Yes          | 177 (50)         | 159 (50.32)       | 9.38E-01 |

Table S3. Distribution of DQA1-DQB1 haplotypes, and their association results on haplotype-progression: estimated coefficient (coef), hazard ratio (HR), standard error (SE), Z-score, p-value and q-value for false positive error rate for individual haplotypes.

| ID | DQA1-DQB1      | N   | coef  | HR   | SE   | Z     | p        | q        |
|----|----------------|-----|-------|------|------|-------|----------|----------|
| 1  | *01:01-*05:01  | 84  | -0.02 | 0.98 | 0.18 | -0.12 | 9.04E-01 | 9.34E-01 |
| 2  | *01:02-*05:02  | 15  | -0.28 | 0.76 | 0.51 | -0.55 | 5.81E-01 | 7.40E-01 |
| 3  | *01:02-*06:04  | 43  | -0.19 | 0.82 | 0.26 | -0.74 | 4.58E-01 | 7.40E-01 |
| 4  | *01:03-*06:03  | 39  | -0.18 | 0.83 | 0.29 | -0.64 | 5.20E-01 | 7.40E-01 |
| 5  | *02:01-*02:02  | 55  | -0.39 | 0.68 | 0.26 | -1.51 | 1.32E-01 | 3.66E-01 |
| 6  | *03:01-*03:02  | 446 | 0.31  | 1.36 | 0.10 | 3.09  | 2.01E-03 | 2.82E-02 |
| 7  | *03:02-*03:03  | 10  | 0.64  | 1.90 | 0.45 | 1.42  | 1.57E-01 | 3.66E-01 |
| 8  | *03:03-*02:02  | 10  | -0.39 | 0.68 | 0.70 | -0.56 | 5.78E-01 | 7.40E-01 |
| 9  | *03:03-*03:01  | 79  | -0.48 | 0.62 | 0.23 | -2.09 | 3.69E-02 | 2.58E-01 |
| 10 | *03:03-*03:02  | 70  | 0.31  | 1.36 | 0.20 | 1.58  | 1.15E-01 | 3.66E-01 |
| 11 | *04:01-*04:02  | 26  | 0.04  | 1.04 | 0.36 | 0.10  | 9.20E-01 | 9.34E-01 |
| 12 | *05:01-*02:01  | 350 | -0.01 | 0.99 | 0.11 | -0.08 | 9.34E-01 | 9.34E-01 |
| 13 | *05:05-*03:01  | 56  | -0.48 | 0.62 | 0.27 | -1.76 | 7.77E-02 | 3.62E-01 |
|    | Rare Hap (<10) | 57  | -0.21 | 0.81 | 0.26 | -0.82 | 4.10E-01 | 7.40E-01 |

Table S4. Motifs of (-18 $\beta$ ,  $\beta$ 57) and their equivalent DQ haplotypes together with motif frequencies among carriers and non-carriers of DQ8.1 who may carry 0, 1 or 2 copies of respective motifs

| Motif | DQ8.1 | Non-DQ8.1 | Equivalent Haplotypes                                                                                                                                         |
|-------|-------|-----------|---------------------------------------------------------------------------------------------------------------------------------------------------------------|
| AA    |       | 427       | *02:01-*02:02   *03:03-*02:02   *03:03-*03:04   *05:01-*02:01                                                                                                 |
| AD    | 80    | 73        | *01:03-*06:01   *03:03-*03:01   *05:03-*03:01   *05:05-*03:01   *05:05-*03:19   *05:05-*03:29   *06:01-*03:01                                                 |
| VA    | 519   | 3         | *03:01-*03:02   *03:03-*03:02   *05:05-*03:02                                                                                                                 |
| VD    | 10    | 86        | *01:03-*06:02   *01:03-*06:03   *01:04-*05:03   *02:01-*03:03   *03:02-*03:03   *03:03-*04:01   *03:03-*04:02   *04:01-*04:02   *04:02-*04:02   *04:04-*04:02 |
| VS    |       | 15        | *01:02-*05:02                                                                                                                                                 |
| VV    |       | 139       | *01:01-*05:01   *01:02-*06:04   *01:02-*06:09   *01:05-*05:01                                                                                                 |
| Total | 609   | 743       | Numbers of motif copies among DQ8.1 carriers and others                                                                                                       |

Table S5. Results from genotypic association analysis of motif (-18 $\beta$ ,  $\beta$ 57) among high risk subjects: genotype frequency, estimated coefficient (coef), hazard ratio (HR), standard error (SE), Z-score and p-value. Rare genotypes with fewer than 10 copies are merged into a single group.

| Genotype    | freq | coef  | HR   | SE   | Z     | p        |
|-------------|------|-------|------|------|-------|----------|
| VA/VA       | 35   | 0.68  | 1.98 | 0.23 | 2.99  | 2.80E-03 |
| AA/AD       | 17   | -2.47 | 0.08 | 1.00 | -2.46 | 1.39E-02 |
| AD/VV       | 10   | -0.70 | 0.49 | 0.58 | -1.21 | 2.28E-01 |
| VA/VD       | 21   | 0.33  | 1.39 | 0.30 | 1.08  | 2.78E-01 |
| AD/VA       | 21   | 0.29  | 1.34 | 0.30 | 0.97  | 3.32E-01 |
| AA/VA       | 100  | 0.14  | 1.15 | 0.17 | 0.83  | 4.08E-01 |
| AA/VV       | 16   | -0.28 | 0.75 | 0.42 | -0.68 | 4.95E-01 |
| VA/VV       | 29   | 0.17  | 1.18 | 0.29 | 0.57  | 5.65E-01 |
| AA/VD       | 14   | -0.13 | 0.88 | 0.42 | -0.31 | 7.57E-01 |
| AA/AA       | 28   | -0.02 | 0.98 | 0.30 | -0.06 | 9.52E-01 |
| Rares (<10) | 25   | -0.83 | 0.43 | 0.42 | -2.00 | 4.53E-02 |

Table S6 Functions of differing residues between HLA-DQA1\*03:01-B1\*03:02 and -DQA1\*03:03-B1\*03:01

| HLA-DQ Molecule/<br>residue | A1*03:01-<br>B1*03:02 | A1*03:03-<br>B1*03:01 | Function of residue                                                          |
|-----------------------------|-----------------------|-----------------------|------------------------------------------------------------------------------|
| a157                        | Asp                   | Ala                   | Participates in the formation of putative homodimer of heterodimers          |
| -b18                        | Val                   | Ala                   | SPa, additional function unknown                                             |
| b13                         | Gly                   | Ala                   | P4b                                                                          |
| b26                         | Leu                   | Phe                   | P4 b                                                                         |
| b45                         | Gly                   | Glu                   | Shapes surface electrostatic potential                                       |
| b57                         | Ala                   | Asp                   | P9 b                                                                         |
| b167                        | Arg                   | His                   | If Arg, participates in RGD loop; function and shape of HGD sequence unknown |
| b185                        | Ile                   | Thr                   | unknown                                                                      |

a) SP = signal peptide; b) P = pocket

Table S7. Result from the association analysis of identified motif of (-) with elevated IAA level at the baseline (430 and 910 participants with IAA level less than or greater than 80): motif frequencies among negative and positive IAA level, estimated odds ratio, Z score and p-value.

| Motif | IAA <80     | ≥ 80        | OR   | Z     | p    |
|-------|-------------|-------------|------|-------|------|
| AA    | 149 (34.65) | 272 (29.89) | 0.86 | -1.86 | 0.06 |
| AD    | 61 (14.19)  | 90 (9.89)   | 0.70 | -2.25 | 0.02 |
| VA    | 149 (34.65) | 370 (40.66) | 1.17 | 2.31  | 0.02 |
| VD    | 33 (7.67)   | 63 (6.92)   | 0.90 | -0.51 | 0.61 |
| VS    | 4 (0.93)    | 11 (1.21)   | 1.30 | 0.46  | 0.65 |
| VV    | 34 (7.91)   | 104 (11.43) | 1.45 | 1.92  | 0.05 |
